# Supplementary material for: Metal–organic framework-engaged synthesis of core–shell MoO2/ZnSe@N-C nanorods as anodes in high-performance lithium-ion batteries
Source: Royal Society of Chemistry journal article supplement (doi:10.1039/d1nj01585k), 2021-01-01
Supplement: d1nj01585k1.pdf [file d1nj01585k1.pdf]

## Supporting Information

### **Metal-organic framework-engaged synthesis of core shell MoO<sub>2</sub>/ZnSe@N-C nanorod for high performance lithium- ion battery anode**

Ming Zhong,<sup>a</sup> Lingling Li,<sup>a</sup> Kun Zhao,<sup>a</sup> Hui Peng,<sup>b</sup> Shixian Xu,<sup>c</sup> Bitao Su,<sup>b\*</sup> Dahui Wang<sup>a\*</sup>

<sup>a</sup> State Key Laboratory of Advanced Processing and Recycling of Non-Ferrous Metals and School of Materials Science and Engineering, Lanzhou University of Technology, Lanzhou 730050, P. R. China.

<sup>b</sup> Key Laboratory of Eco-functional Polymer Materials of the Ministry of Education, Key Laboratory of Eco-Environmental Polymer Materials of Gansu Province, College of Chemistry and Chemical Engineering, Northwest Normal University, Lanzhou 730070, P. R. China.

<sup>c</sup> College of Chemistry and Environmental Science, Shangrao Normal University, Shangrao 334001, P. R. China.

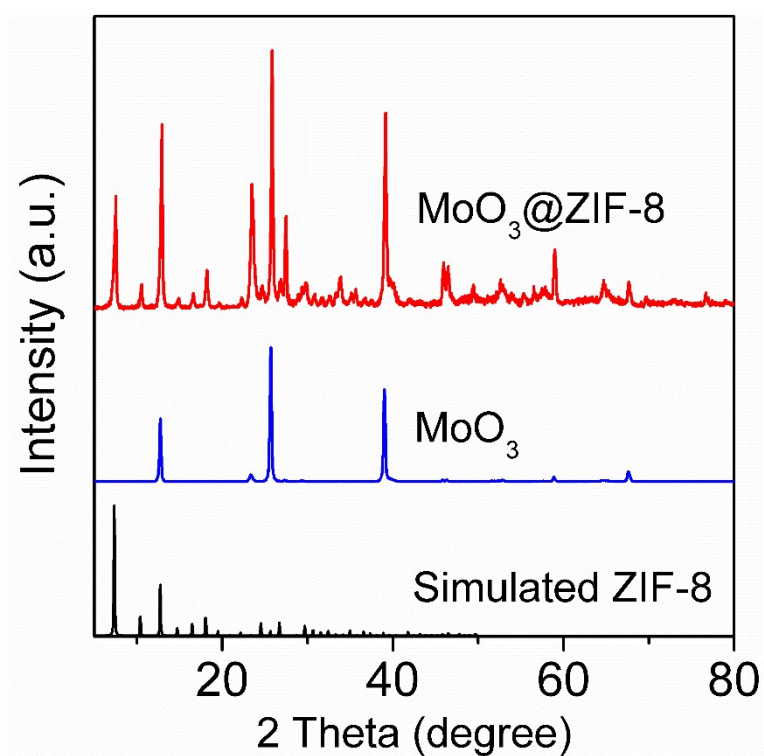

**Figure S1.** XRD patterns of MoO<sub>3</sub> and MoO<sub>3</sub>@ZIF-8 precursor.

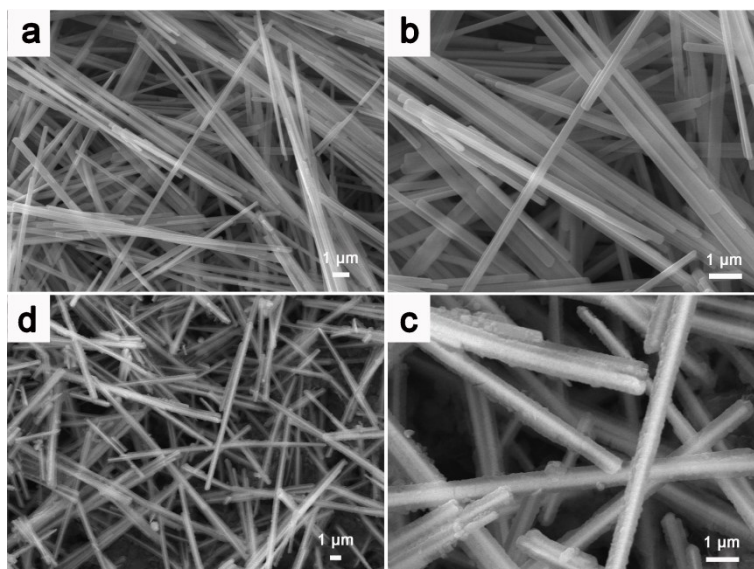

**Figure S2.** SEM images of MoO<sub>3</sub> nanorods (a, b) and MoO<sub>3</sub>@ZIF-8 precursor (c, d).

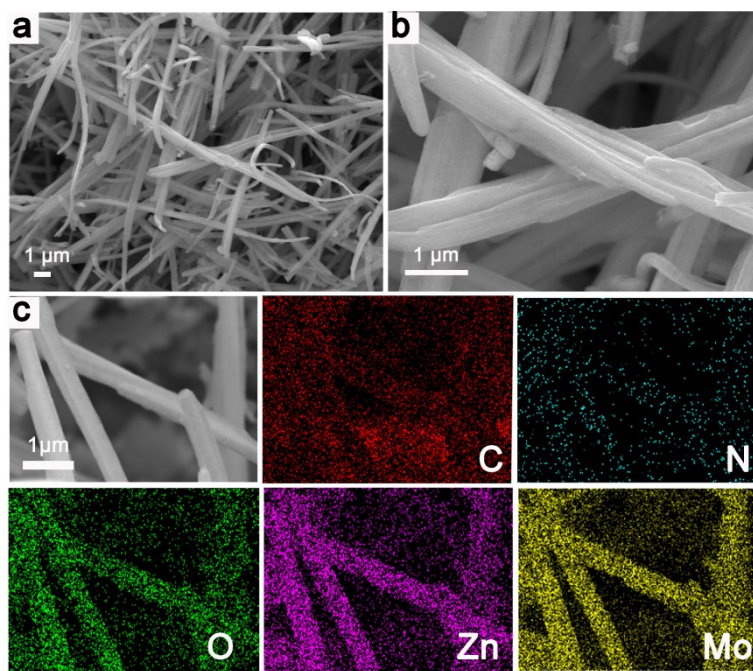

**Figure S3.** SEM images and corresponding EDS mapping of the as-obtained MoO<sub>2</sub>/ZnO@N-C-700 sample.

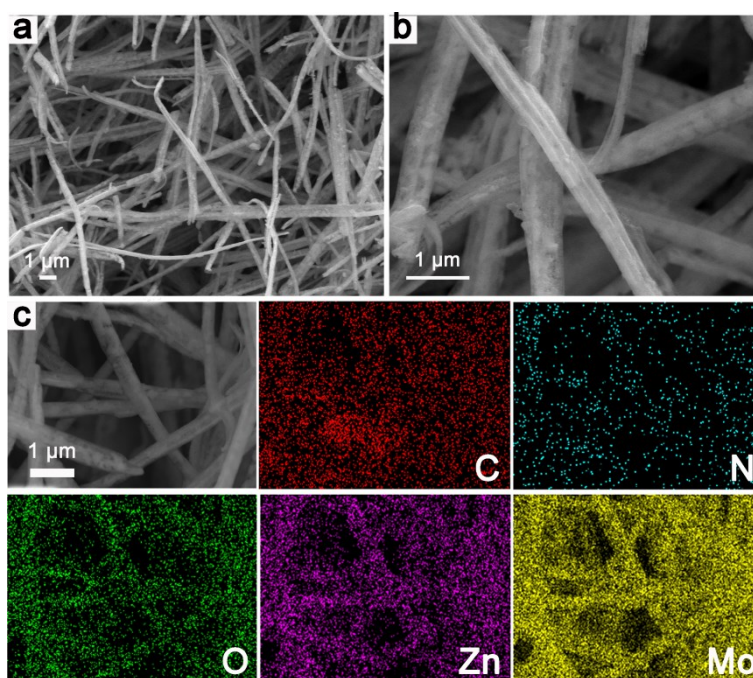

**Figure S4.** SEM images and corresponding EDS mapping of the as-obtained MoO<sub>2</sub>/ZnO@N-C-800 sample.

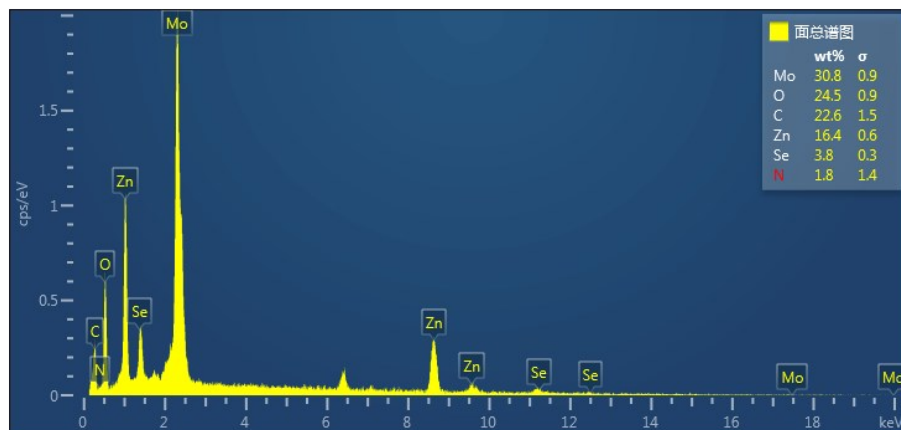

**Figure S5.** EDS result of as-formed MoO<sub>2</sub>/ZnSe@N-C sample.

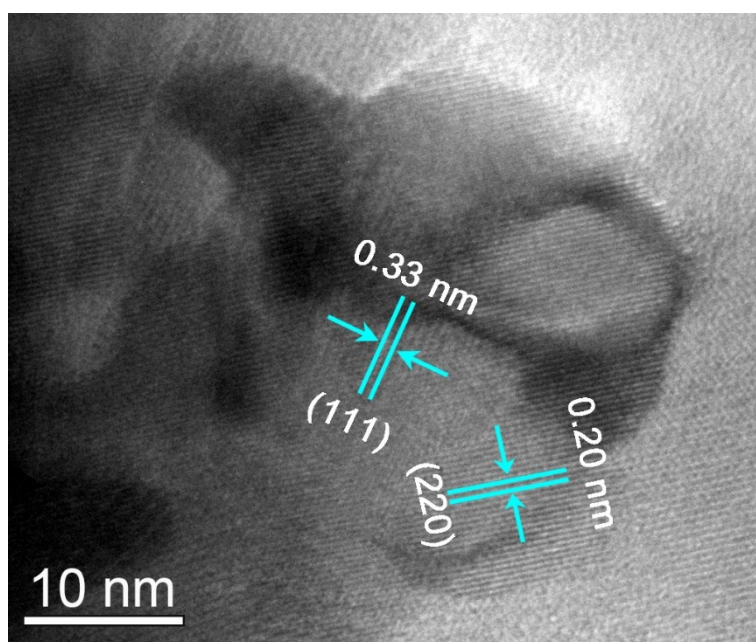

**Figure S6.** HRTEM image of as-prepared MoO<sub>2</sub>/ZnSe@N-C sample.

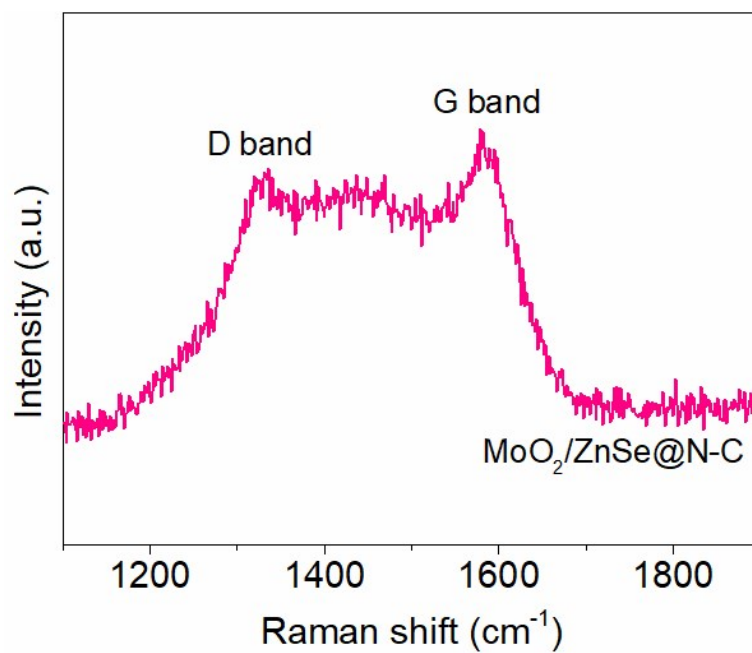

**Figure S7.** Raman spectrum of as-obtained MoO<sub>2</sub>/ZnSe@N-C sample.

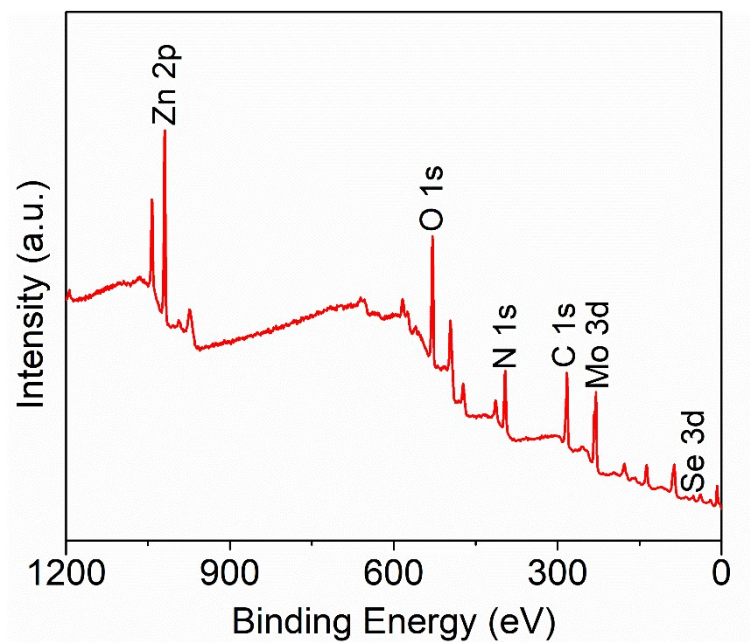

**Figure S8.** The full XPS spectrum of as-obtained MoO<sub>2</sub>/ZnSe@N-C sample.

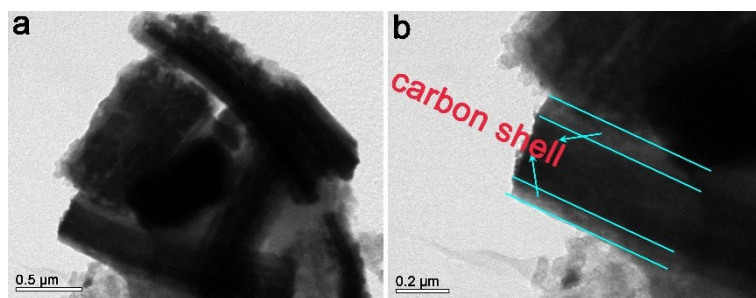

**Figure S9.** (a, b) TEM images of as-formed  $\text{MoO}_2/\text{ZnSe}@N\text{-C-600}$  sample after 100 cycles at a current density of  $100 \text{ mA g}^{-1}$ .

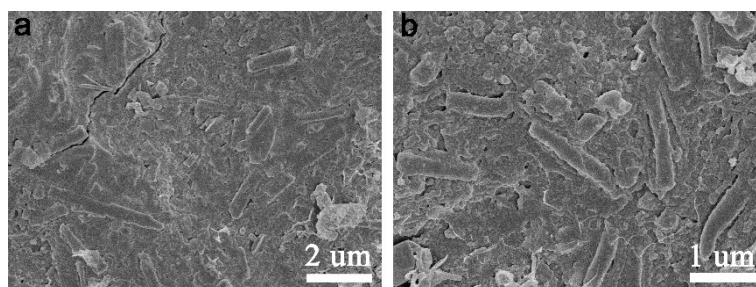

**Figure S10.** SEM images of as-formed  $\text{MoO}_2/\text{ZnSe}@N\text{-C-600}$  sample after 900 cycles at a current density of  $500 \text{ mA g}^{-1}$ .

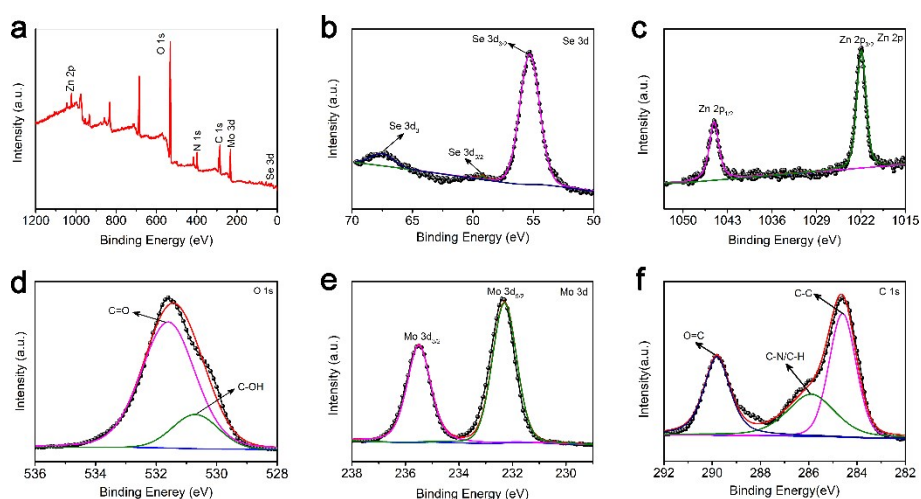

**Figure S11.** The full spectrum and high-resolution Zn, Mo, Se, O, C, and N spectra of as-formed  $\text{MoO}_2/\text{ZnSe}@N\text{-C-600}$  sample after 900 cycles at a current density of  $500 \text{ mA g}^{-1}$ .
